# Supplementary material
Source: publisher site journal article supplement (https://www.dovepress.com/article/553015)
Supplement: Supplementary file 1 [file Appendix%201.docx]

Appendix 1.

Breast Cancer Handbook Table of Contents

1. Breast cancer
   1. Breast cancer basics
      1. What is breast cancer?
         1. Types
      2. Signs and Symptoms
      3. Facts and Statistics
      4. Risk Factors
   2. Screening and Early Detection
      1. American Cancer Society (ACS) Screening recommendation
         1. Mammogram
         2. Breast MRI and Ultrasound
         3. Other imaging
   3. Diagnosis
      1. Biopsies
      2. Staging Workup
      3. Prognosis
      4. Stages of breast cancer
      5. Prognosis
2. Treatment
   1. Choosing therapies: Why did your doctor recommend surgery, radiation, chemotherapy, hormone therapy
   2. Surgery
      1. Lumpectomy
      2. Mastectomy
      3. Breast Reconstruction
   3. Radiation Therapy
      1. Going Through Radiation
      2. Common Side effects
   4. Chemotherapy
      1. Going Through Chemotherapy
      2. Common Side effects
      3. Side effect management
   5. Hormone Therapies
      1. Tamoxifen
      2. Aromatase Inhibitor
         1. Anastrozole
         2. Letrozole
         3. Exemestane
      3. Common Side effects
      4. Side effects management
   6. Targeted Therapies
      1. Cyclin Dependent Kinase Inhibitors (CDK 4 / 6 inhibitors)
         1. Palbociclib
         2. Ribociclib
         3. Abemaciclib
      2. Immunotherapy
         1. Pembrolizumab
   7. Complementary and Alternative Therapies
      1. Massage
      2. Dietary supplements
      3. Homeopathic medicine
3. Moving on
   1. Survivorship
   2. Overcoming Uncertainty
   3. Follow up
   4. Relationship with your providers
4. Local resources
   1. Social Worker assistant/Care Navigation program within clinic
      1. Contact information
   2. Financial Assistance and Insurance
      1. Financial Assistance
         1. Programs available
            1. Drug company assistance programs
            2. Patient assistance programs
            3. Foundation and grant money
      2. Insurance
         1. Why is my treatment denied?
            1. What does it mean?
            2. What are the next steps?
   3. Community Organization(s)
      1. Little Red Door
      2. Susan G Komen
   4. Transportation
      1. Transportation services provided by insurance
      2. Ride sharing services
      3. Volunteer drivers
      4. Public transportation
   5. Peer Support/ Peer Navigation
      1. Way to join and connect
   6. Emotional Support and Counseling
      1. Contact information
